# Supplementary material
Source: publisher site journal article supplement (https://www.kjim.org/upload/media/kjim-2025-224-Supplementary-Fig-2.pdf)
Supplement: Supplementary file 1 [file kjim-2025-224-Supplementary-Fig-2.pdf]

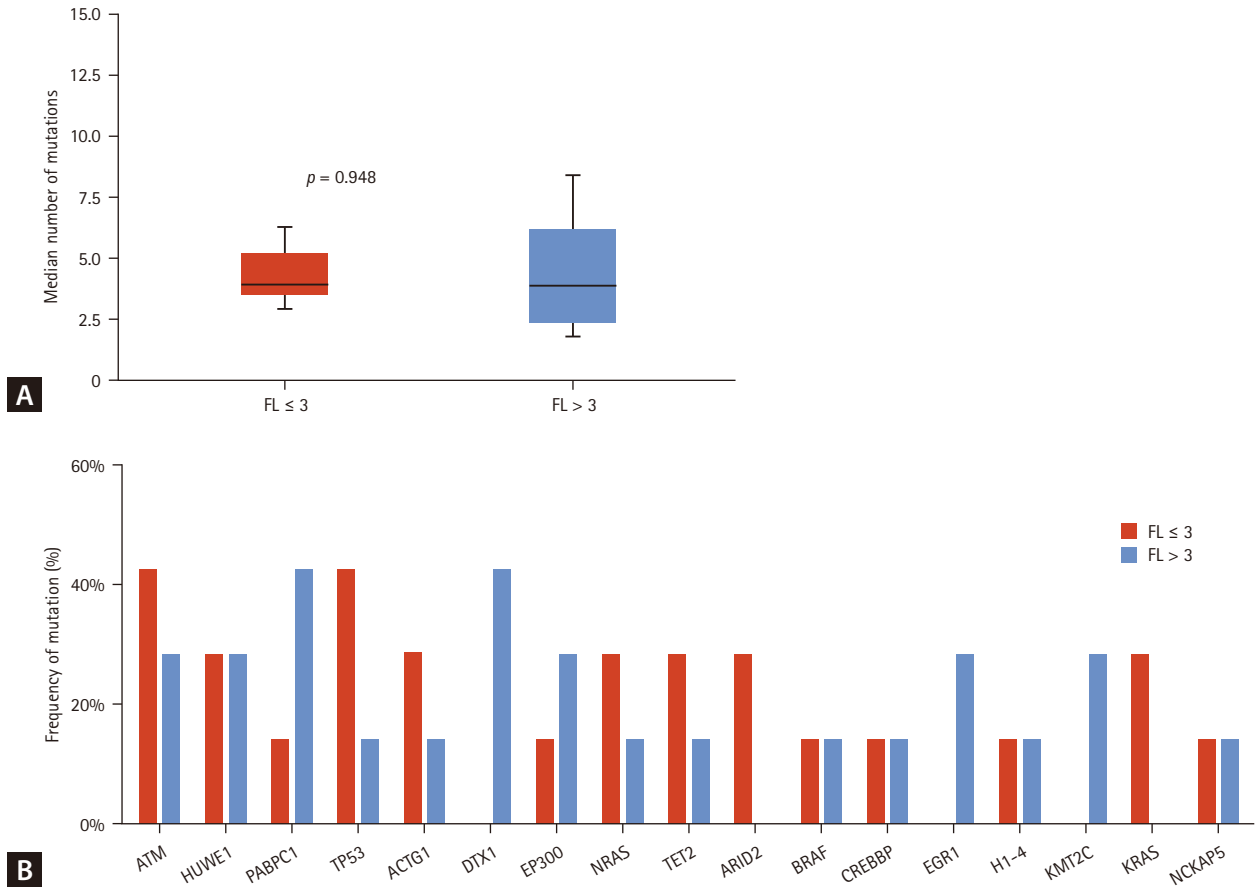

**Supplementary Figure 2.** Mutational characteristics relevant to the number of FL. (A) Box plot of the median number of mutations. (B) Frequency of each mutation. FL, focal lesion.
